# Supplementary material for: Dual chalcogenide coordination engineering on a self-supported alloy electrode for enhanced hydrogen evolution reaction
Source: Royal Society of Chemistry journal article supplement (doi:10.1039/d4dt02823f), 2024-11-21
Supplement: d4dt02823f1.pdf [file d4dt02823f1.pdf]

# Dual chalcogenide coordination engineering on self-supported alloy electrode for enhanced hydrogen evolution reaction

*Shaobo Huang\**, *Fanhui Meng*, *Jianhui Dong*, *Wenhao Zhuang*, *Zexin Liang*, *Chengfeng Fan*,

*Xiaoyi Hou*, *Huiwen Wang*

College of Physics and Engineering, Henan University of Science and Technology, Luoyang,

471023, China.

KEYWORDS: HER; Self-supported; Chalcogenide doping; Alloy electrode;

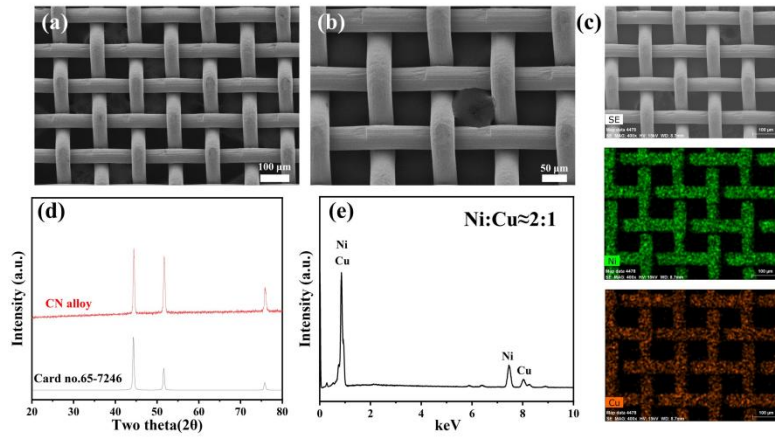

**Fig. S1** Monel alloy mesh . (a) Low magnification SEM image, (b) High magnification SEM image, (c) Mapping SEM images, (d) XRD pattern, (e) EDS data

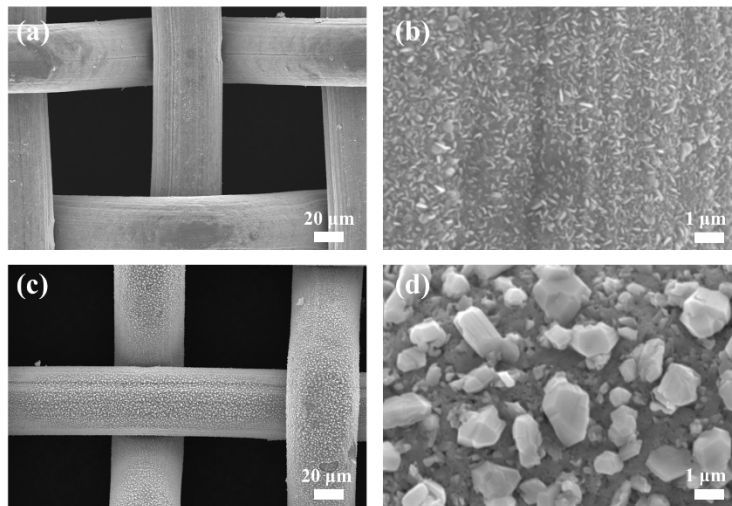

**Fig. S2** The SEM images of CNS and CNSe sample. (a-b) CNS, (c-d) CNSe

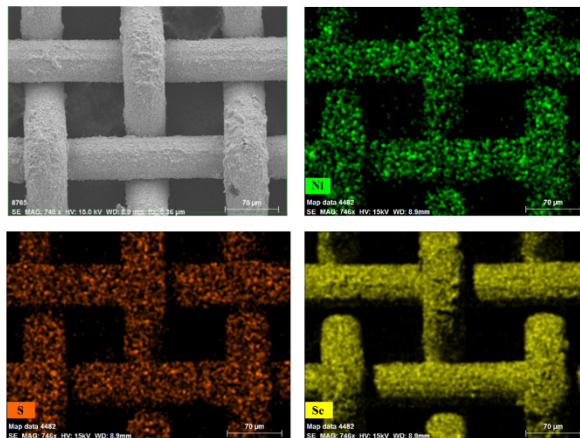

**Fig. S3** The EDS mapping image of CNSSe

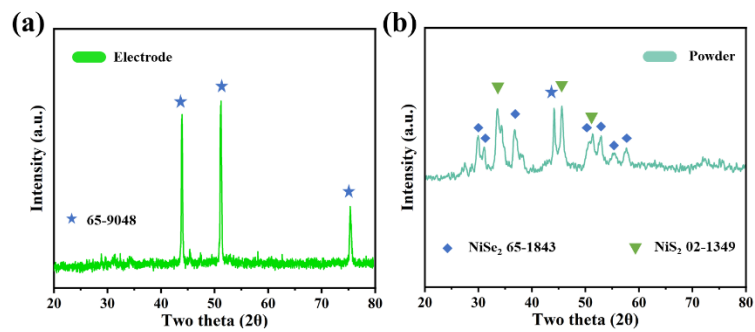

**Fig. S4** The XRD pattern of CNSSe. (a) Electrode, (b) Powder after peel off from electrode

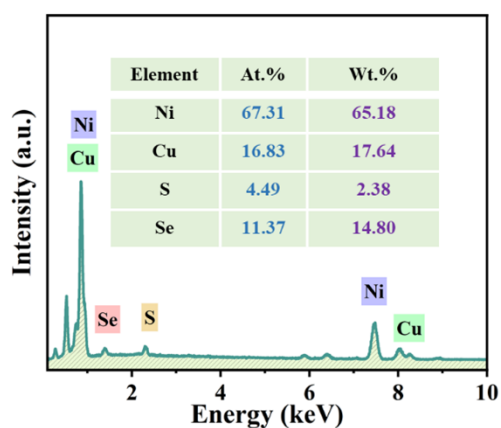

Fig. S5 The EDS mapping data of CNSSe sample

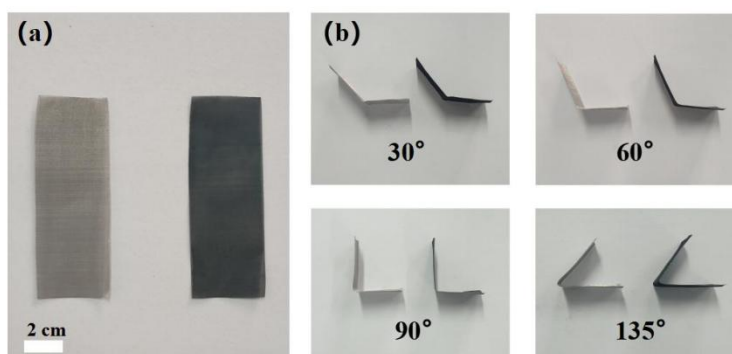

Fig. S6 The Structural stability testing at various bending angle. a) 0°, b) 30°, 60°, 90°, 135°.

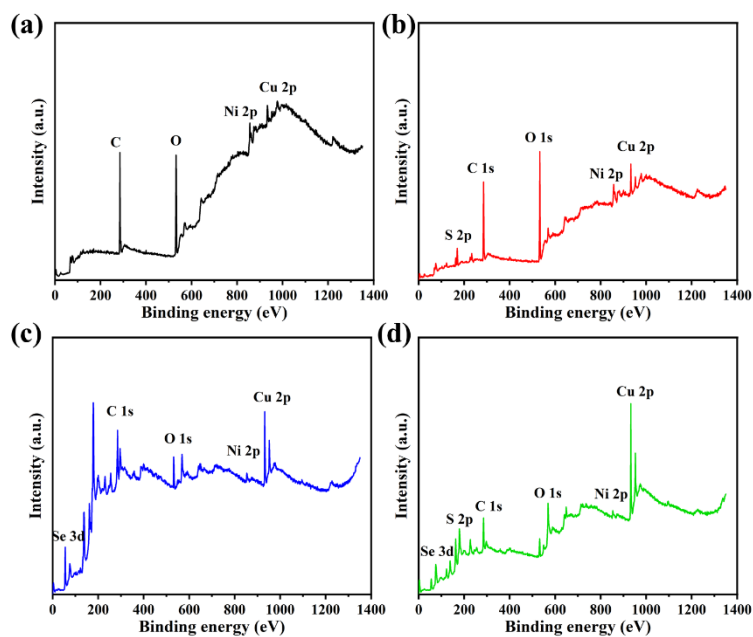

Fig. S7 The survey XPS spectra. (a) CN alloy, (b) CNS, (c) CNSe, (d) CNSSe

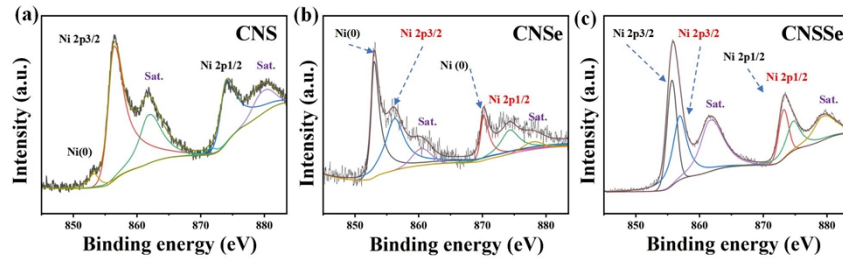

**Fig. S8.** High-resolution XPS spectra of Ni 2p (a) CNS, (b) CNSe, (c) CNSSe sample

Table The detail parameters

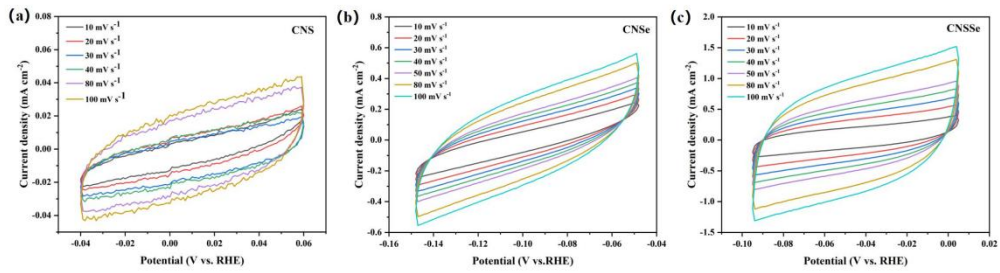

**Fig. S9.** The CV curves of a) CNS sample, b) CNSe sample, c) CNSSe sample

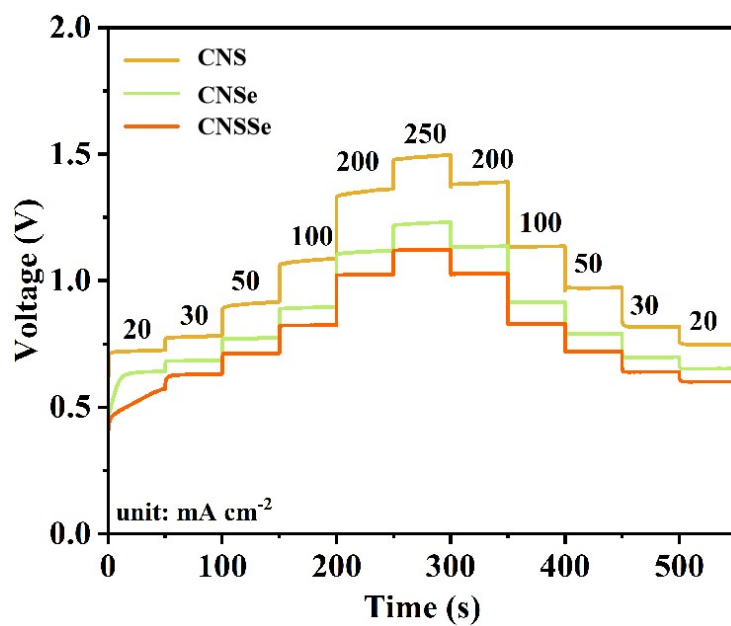

**Fig. S10.** Multi-steps of chronopotentiometry measurement of electrode at different current densities

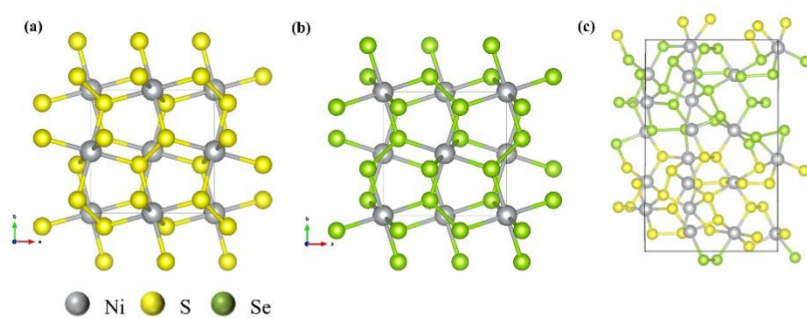

**Fig. S11** Structural modeling of (a) NiS<sub>2</sub>, (b) NiSe<sub>2</sub>, and (c) NiSSe.

**Table S1.** The R<sub>ct</sub> and R<sub>Ω</sub> values from the equivalent circuit

| Catalyst | R <sub>Ω</sub> | R <sub>ct</sub> |
|----------|----------------|-----------------|
| CN       | 1.8            | 9               |
| CNS      | 2.1            | 8.4             |
| CNSe     | 1.3            | 6.9             |
| CNSSe    | 1.4            | 4.5             |
